# Supplementary material for: Development of a Plastic Casing Air Cleaner for Medium-Duty Vehicles
Source: PLOS journal article supplement (doi:10.1371/journal.pone.0064388), 1991-11-01

# Figure S5

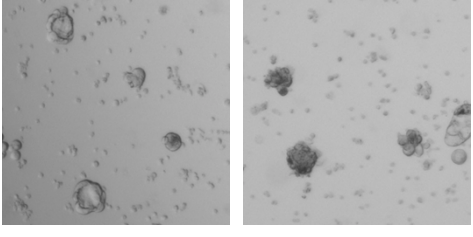

Supplement: S5 (10.1371/journal.pone.0064388.s005) [file journal.pone.0064388.s005]
